# Supplementary material for: A DNA functionalized metal–organic framework combined with magnesium peroxide nanoparticles: targeted and enhanced photodynamic therapy
Source: Royal Society of Chemistry journal article supplement (doi:10.1039/d1qm01475g), 2022-01-01
Supplement: d1qm01475g1.pdf [file d1qm01475g1.pdf]

## Supporting Information

# DNA Functionalized Metal-Organic Framework Combing with Magnesium Peroxide Nanoparticles: Targeted and Enhanced Photodynamic Therapy

Xinran Sun, Guoda Zhang, Xilai Ding, Yingyan Liu, Kaixiu Chen, Pengfei Shi\* and

Shusheng Zhang\*

Shandong Provincial Key Laboratory of Detection Technology for Tumor Markers,  
School of Chemistry and Chemical Engineering, Linyi University, Linyi 276000,  
Shandong, P. R. China.

### Contents

|                                                                                                                                          |    |
|------------------------------------------------------------------------------------------------------------------------------------------|----|
| <b>Fig. S1.</b> XPS high-resolution spectrum of Hf 4f in Hf-MOF-MgO <sub>2</sub> /DNA.                                                   | 2  |
| <b>Fig. S2.</b> XPS high-resolution spectrum of Mg 1s in Hf-MOF-MgO <sub>2</sub> /DNA.                                                   | 2  |
| <b>Fig. S3.</b> XPS spectra of Mg 1s in MgO <sub>2</sub> , Hf-MOF and Hf-MOF-MgO <sub>2</sub> /DNA.                                      | 3  |
| <b>Fig. S4.</b> TEM image of MgO <sub>2</sub> .                                                                                          | 3  |
| <b>Fig. S5.</b> PXRD patterns of MgO <sub>2</sub> , Hf-MOF, Hf-MOF-MgO <sub>2</sub> /DNA.                                                | 4  |
| <b>Fig. S6.</b> Fluorescence spectra of DCFH incubated with MgO <sub>2</sub> , Hf-MOF and Hf-MOF-MgO <sub>2</sub> .                      | 4  |
| <b>Fig. S7.</b> UV-Vis absorbance of Hf-MOF by combining different amounts of MgO <sub>2</sub> .                                         | 5  |
| <b>Fig. S8.</b> UV-Vis absorbance of DNA before and after modification with Hf-MOF-MgO <sub>2</sub> .                                    | 5  |
| <b>Fig. S9.</b> Images of O <sub>2</sub> bubbles generated by the freshly synthesized MgO <sub>2</sub> and Hf-MOF-MgO <sub>2</sub> /DNA. | 6  |
| <b>Fig. S10.</b> UV-Vis absorbance spectra of H <sub>2</sub> TCPP ligands at different concentration.                                    | 6  |
| <b>Fig. S11</b> The calibration curve of absorbance at 418 nm and the concentration of H <sub>2</sub> TCPP.                              | 7  |
| <b>Fig. S12.</b> Confocal images of calcein AM and PI co-stained 4T1 cells under normoxia conditions.                                    | 7  |
| <b>Fig. S13.</b> Confocal images of calcein AM and PI co-stained 4T1 cells under hypoxia conditions.                                     | 8  |
| <b>Fig. S14.</b> Confocal images of calcein AM and PI co-stained A549 cells under normoxia conditions.                                   | 8  |
| <b>Fig. S15.</b> Confocal images of calcein AM and PI co-stained A549 cells under hypoxia conditions.                                    | 9  |
| <b>Fig. S16.</b> Confocal images of Calcein-AM/PI stained 4T1 and A549 cells without light irradiation.                                  | 9  |
| <b>Fig. S17.</b> Confocal images of ROS generation in 4T1 and A549 cells without light irradiation.                                      | 10 |
| <b>Fig. S18.</b> The fluorescence imaging of mice and major organs.                                                                      | 10 |
| <b>Fig. S19.</b> Tumor weight of different groups after treatment.                                                                       | 10 |

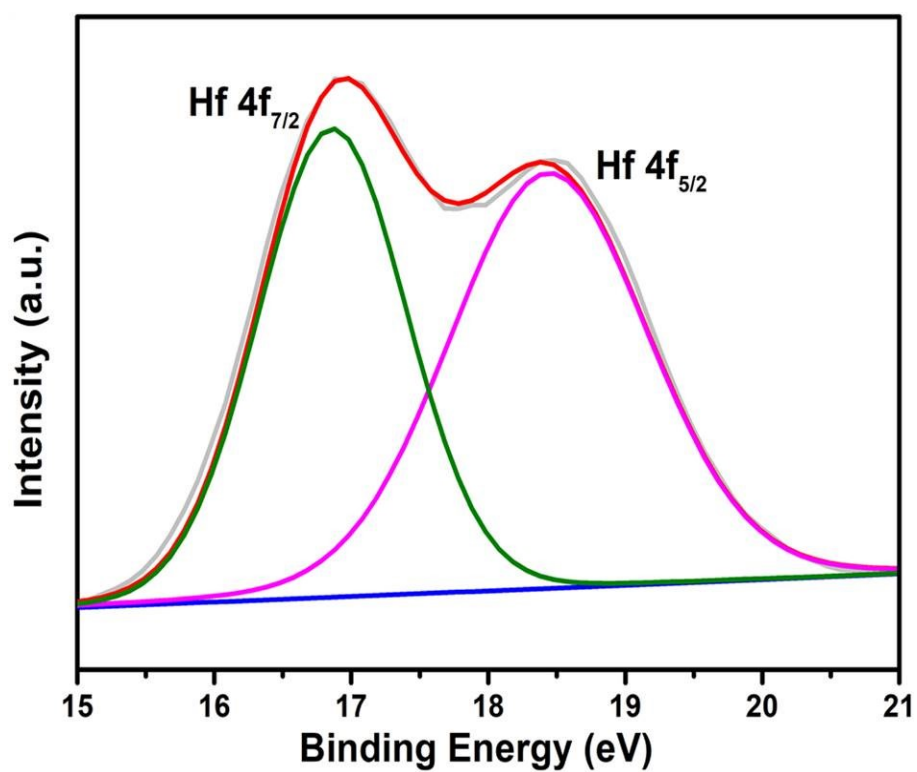

Fig. S1. XPS high-resolution spectrum of Hf 4f in Hf-MOF-MgO<sub>2</sub>/DNA.

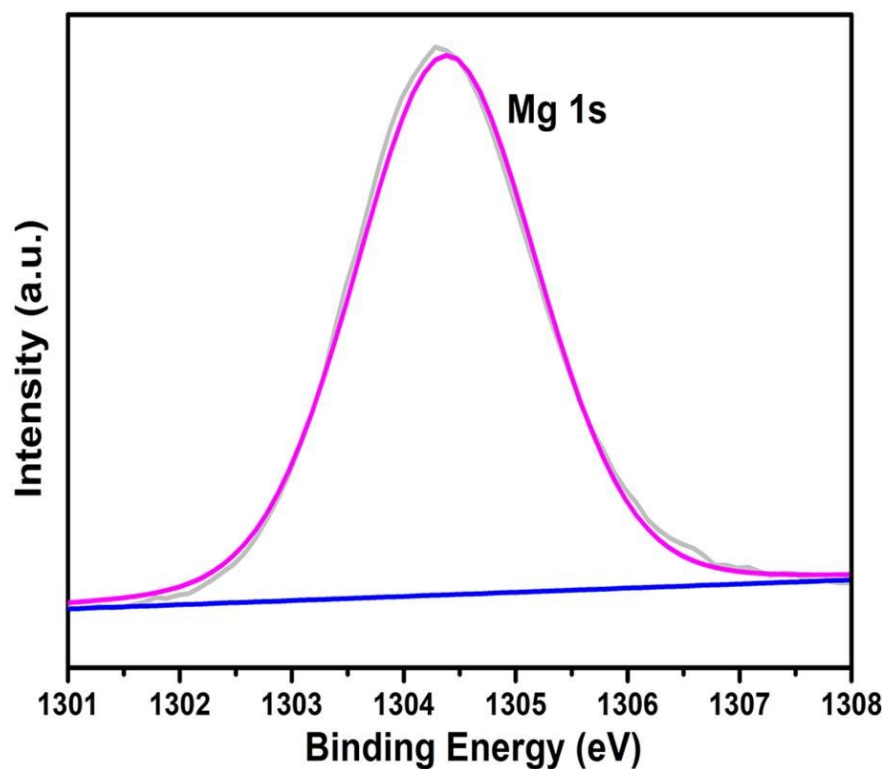

Fig. S2. XPS high-resolution spectrum of Mg 1s in Hf-MOF-MgO<sub>2</sub>/DNA.

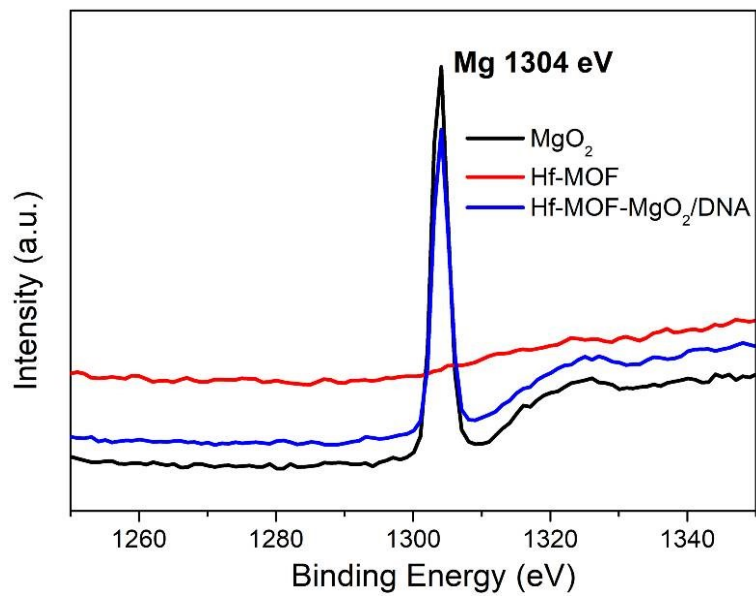

**Fig. S3.** XPS spectra of Mg 1s in MgO<sub>2</sub>, Hf-MOF and Hf-MOF-MgO<sub>2</sub>/DNA.

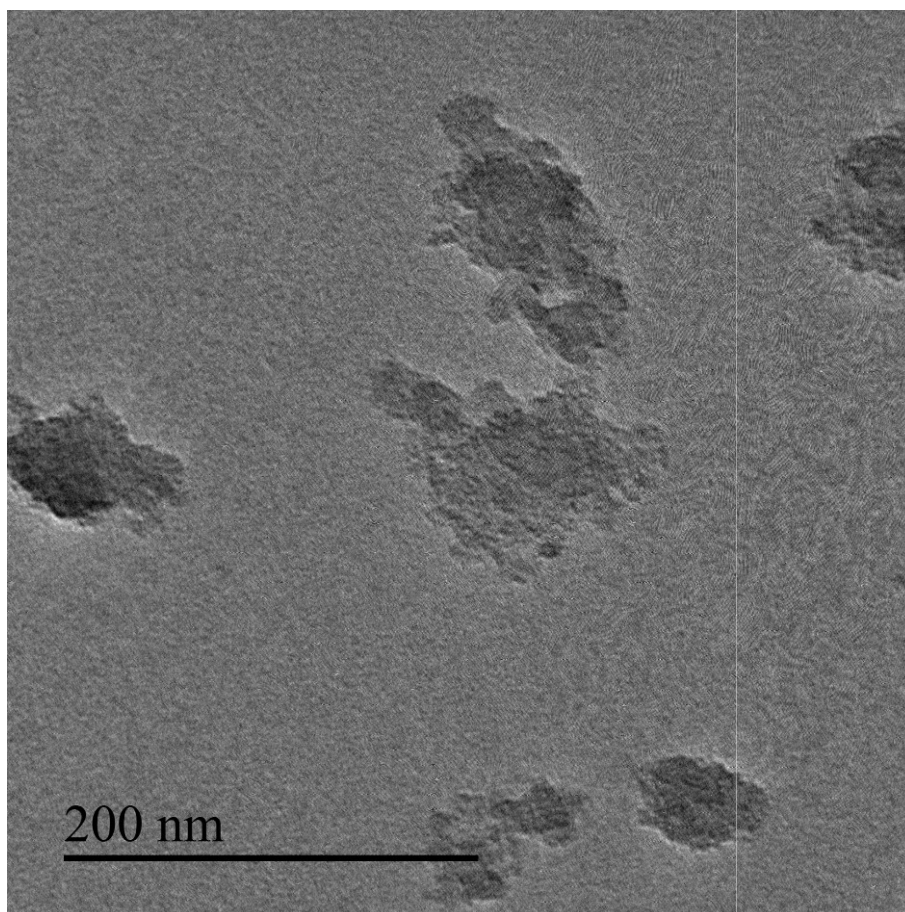

**Fig. S4.** TEM images of MgO<sub>2</sub>.

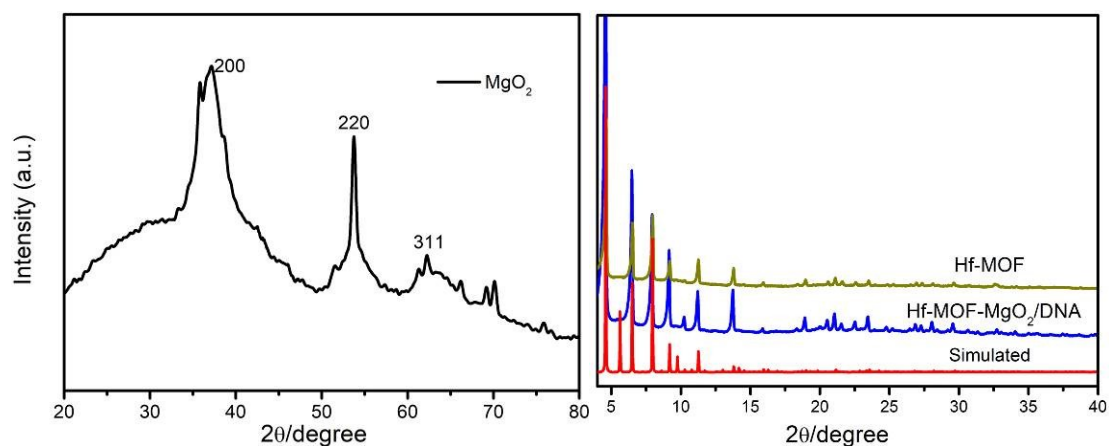

**Fig. S5.** PXRD patterns of  $\text{MgO}_2$ , Hf-MOF, Hf-MOF- $\text{MgO}_2/\text{DNA}$  and the simulated from the crystal data of PCN-224.

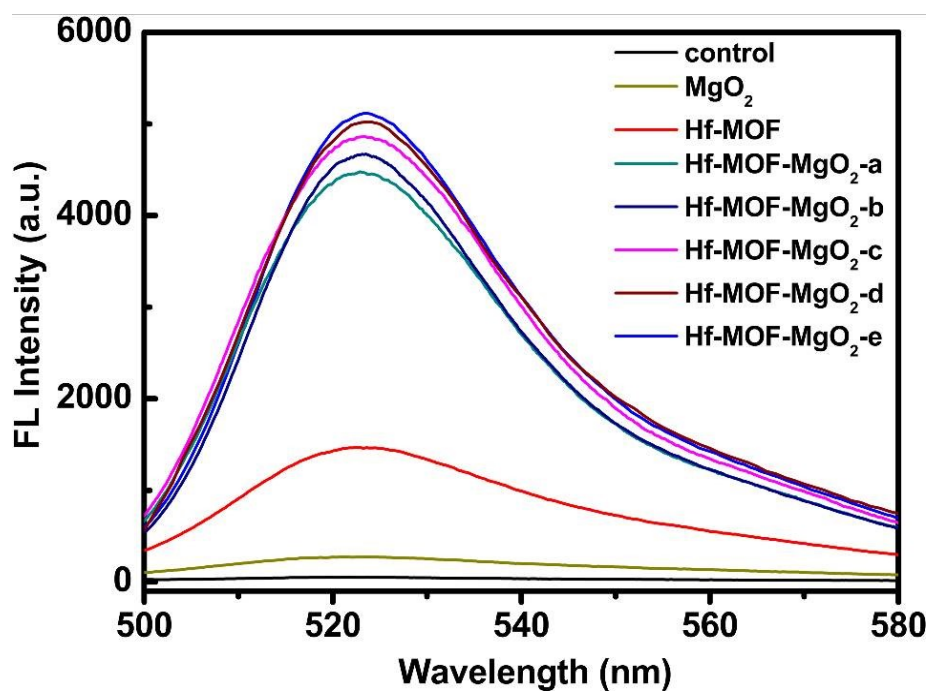

**Fig. S6.** Fluorescence spectra of DCFH incubated with  $\text{MgO}_2$ , Hf-MOF and Hf-MOF- $\text{MgO}_2$  in the presence of light irradiation (Hf-MOF- $\text{MgO}_2$ -abcde represents the products when Hf-MOF reacted with different amounts of  $\text{MgO}$ ).

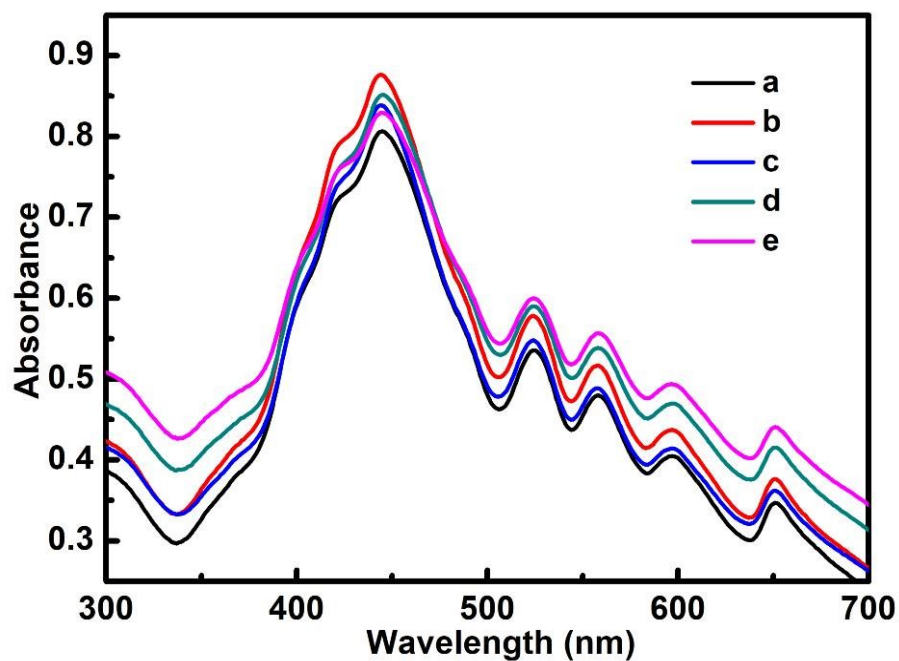

Fig. S7. UV-Vis absorbance of Hf-MOF by combining different amounts of MgO<sub>2</sub>.

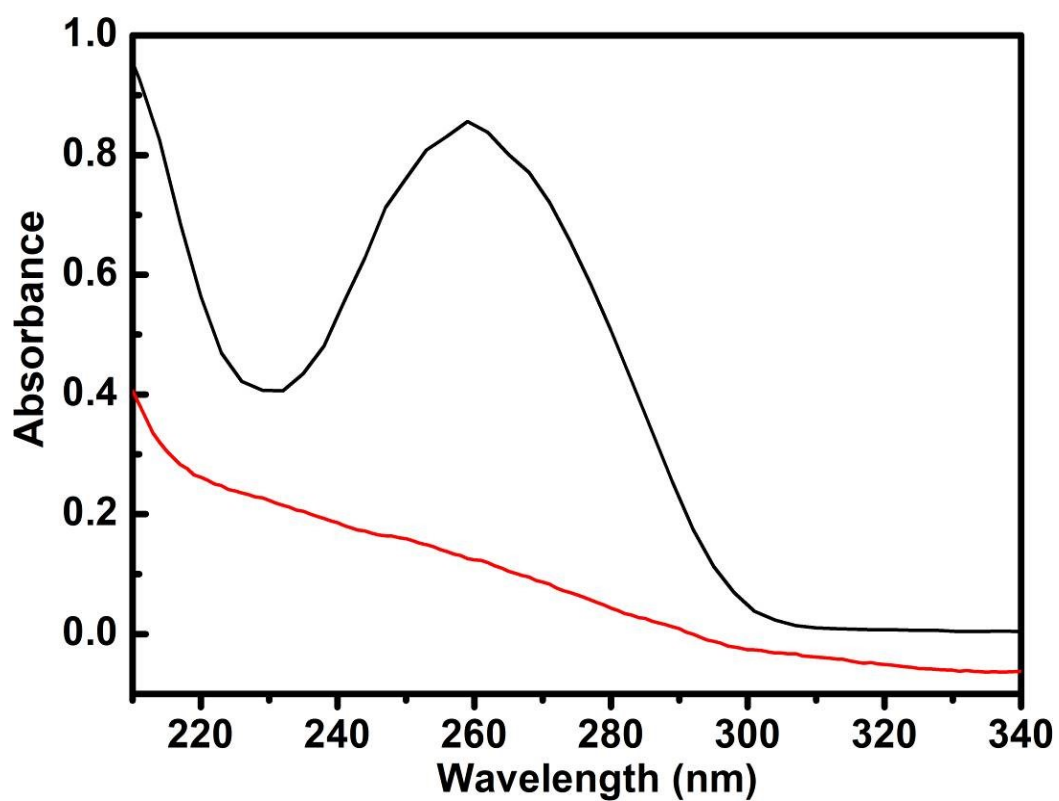

Fig. S8. UV-Vis absorbance of DNA before (black) and after (red) modification with Hf-MOF-MgO<sub>2</sub>.

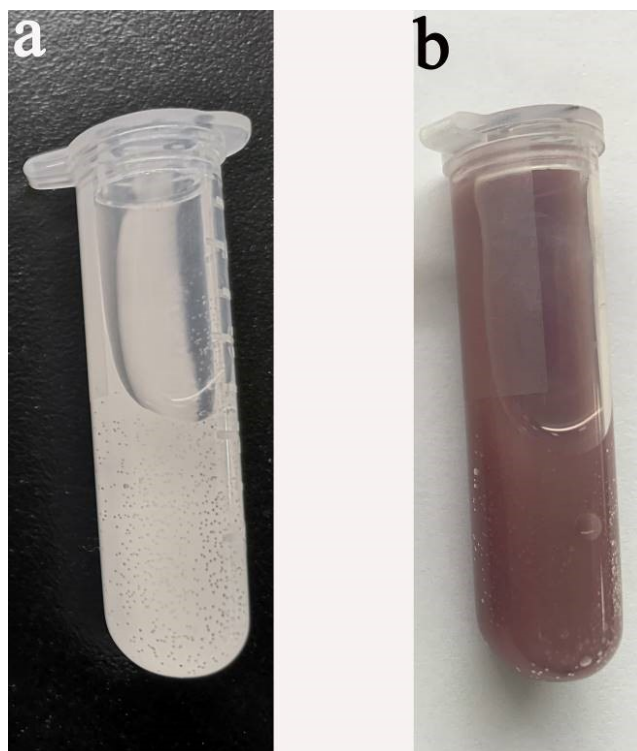

**Fig. S9.** Images of O<sub>2</sub> bubbles generated by the freshly synthesized (a) MgO<sub>2</sub> and (b) Hf-MOF-MgO<sub>2</sub>/DNA in water.

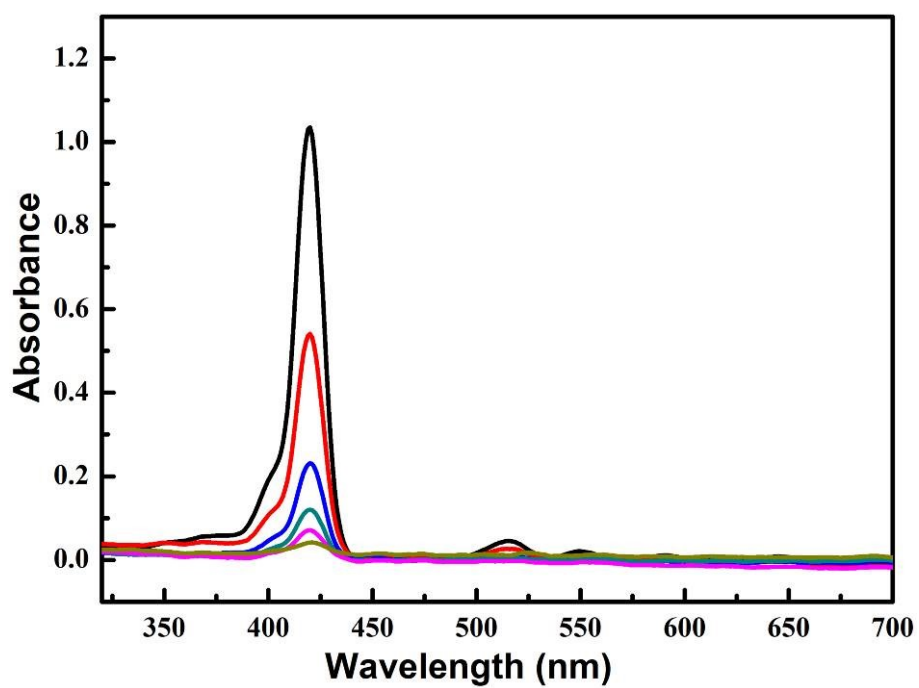

**Fig. S10.** UV-Vis absorbance spectra of H<sub>2</sub>TCPP ligands at different concentration (0.1, 0.5, 1, 2, 5 and 10  $\mu$ M).

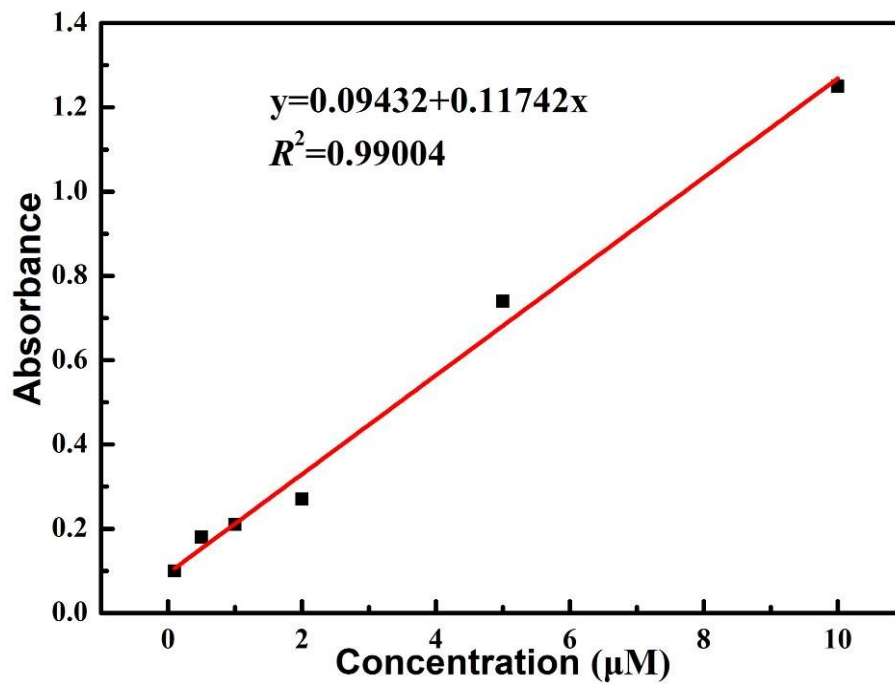

**Fig. S11.** The calibration curve of absorbance at 418 nm and the concentration of H<sub>2</sub>TCPP.

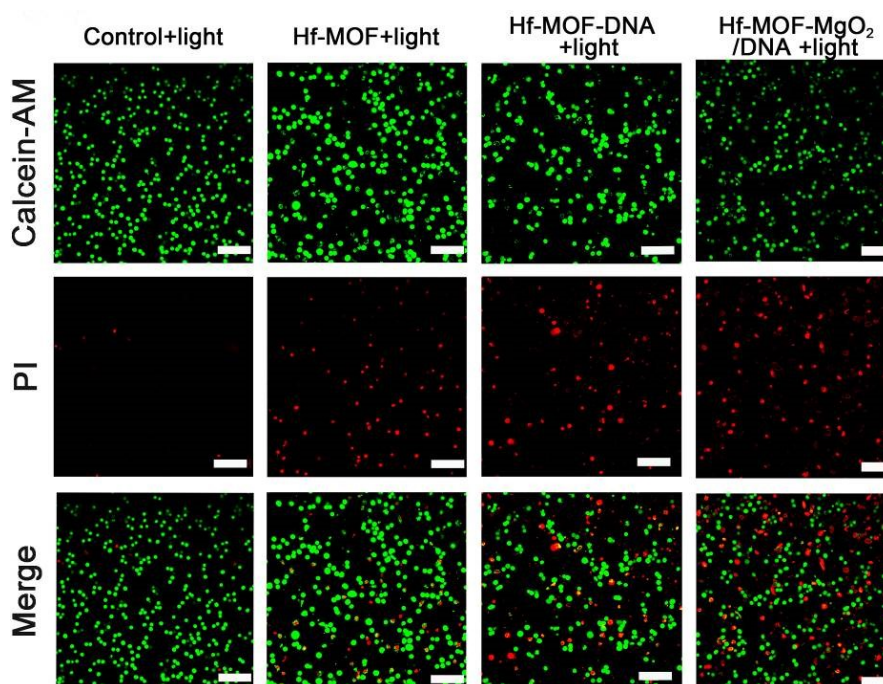

**Fig. S12.** Confocal images of calcein AM and PI co-stained 4T1 cells treated with different agents under normoxia conditions. Scale bar: 100 μm.

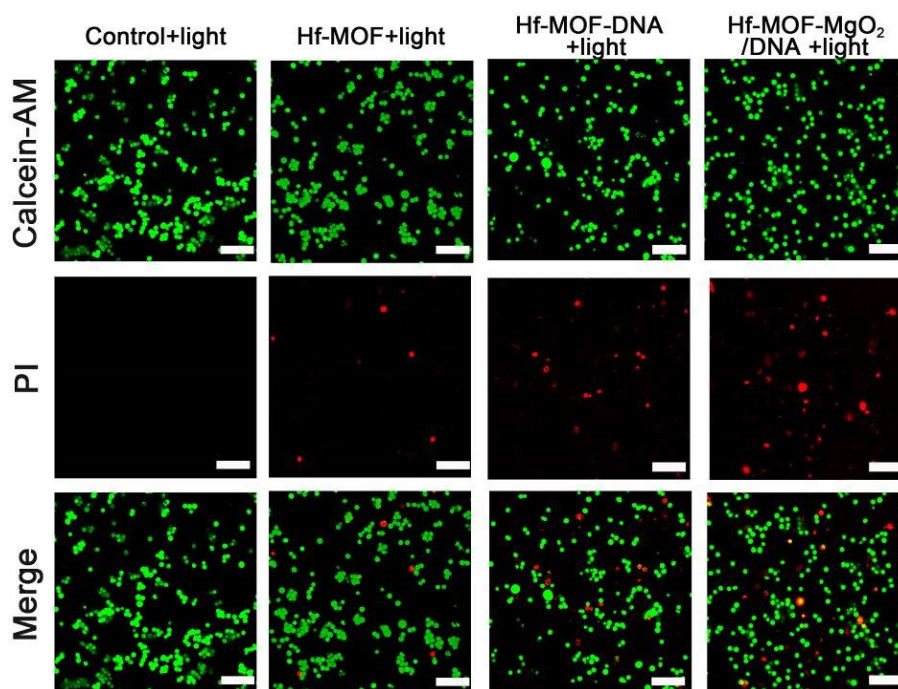

**Fig. S13.** Confocal images of calcein AM and PI co-stained 4T1 cells treated with different agents under hypoxia conditions. Scale bar: 100  $\mu$ m.

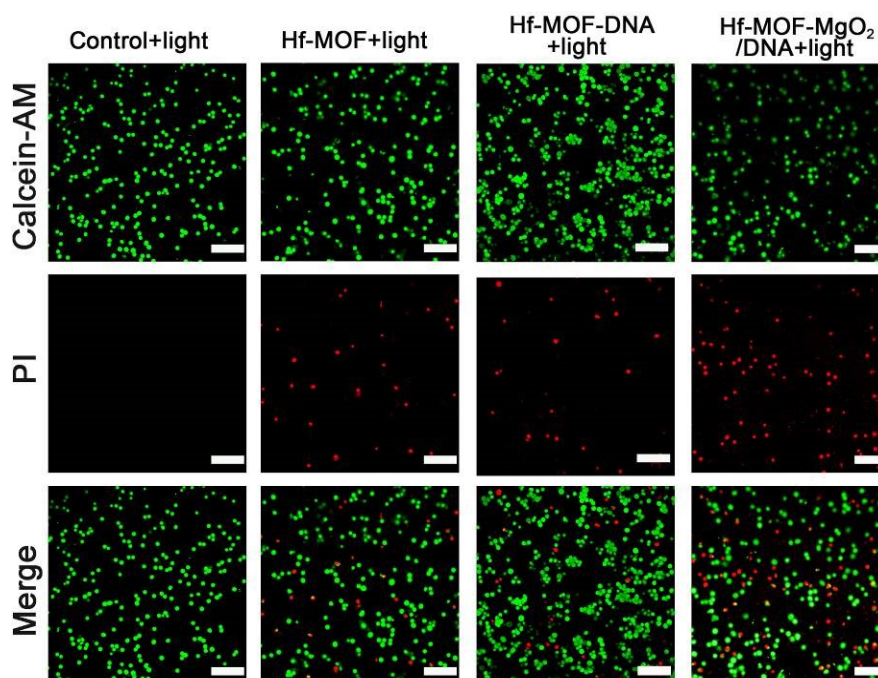

**Fig. S14.** Confocal images of calcein AM and PI co-stained A549 cells treated with different agents under normoxia conditions. Scale bar: 100  $\mu$ m.



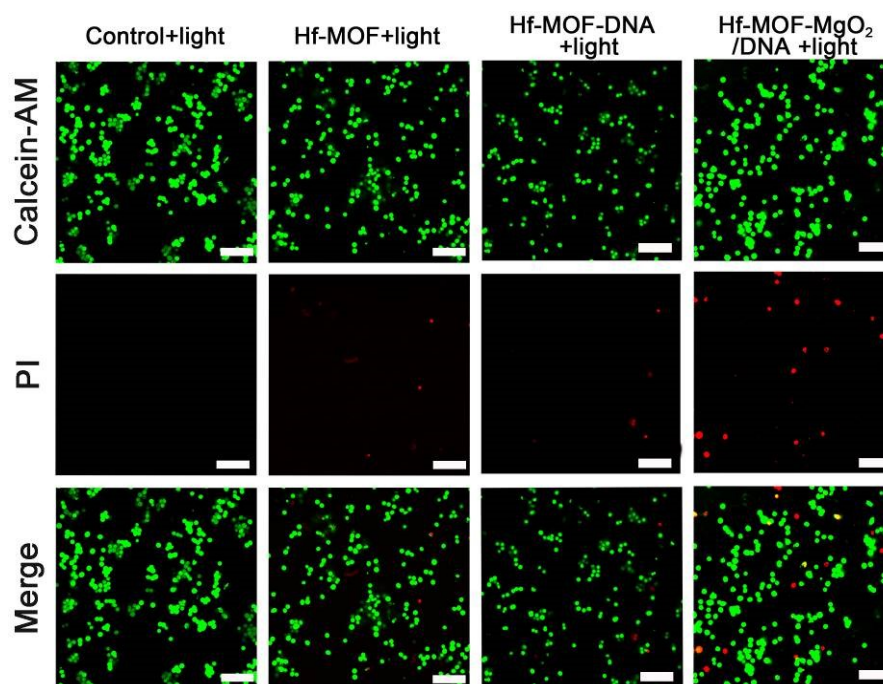

**Fig. S15.** Confocal images of calcein AM and PI co-stained A549 cells treated with different agents under hypoxia conditions. Scale bar: 100  $\mu\text{m}$ .

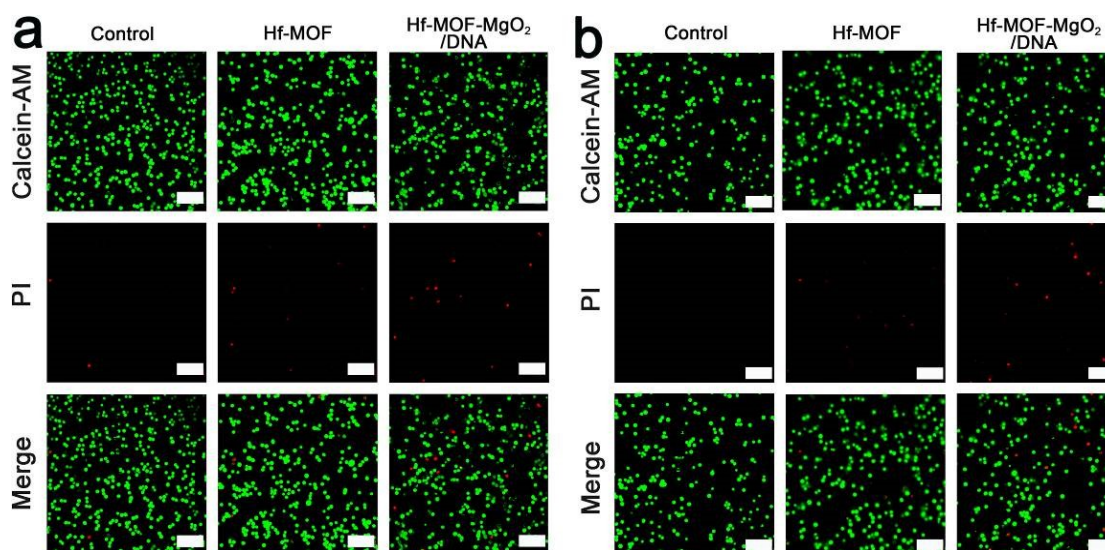

**Fig. S16.** Confocal images of Calcein-AM/PI stained 4T1 (a) and A549 cells (b) after incubation with Hf-MOF and Hf-MOF-MgO<sub>2</sub>/DNA without light irradiation. Scale bar: 100  $\mu\text{m}$ .

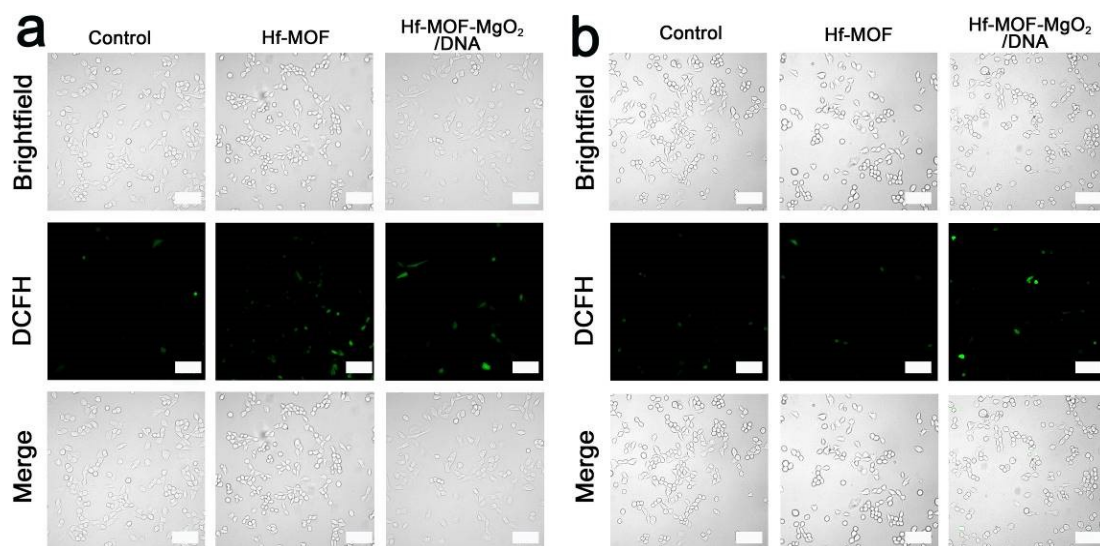

**Fig. S17.** Confocal images of ROS generation in 4T1 (a) and A549 cells (b) after incubation with Hf-MOF and Hf-MOF-MgO<sub>2</sub>/DNA without light irradiation. Scale bar: 100 μm.

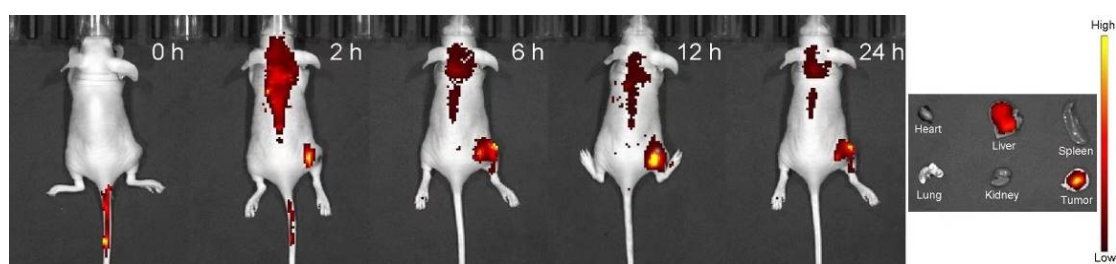

**Fig. S18.** The fluorescence imaging of 4T1 tumor-bearing mice taken at different time points after intravenous injection with Hf-MOF-MgO<sub>2</sub>/DNA and fluorescence imaging of major organs and tumor after intravenous injection at 24 h.

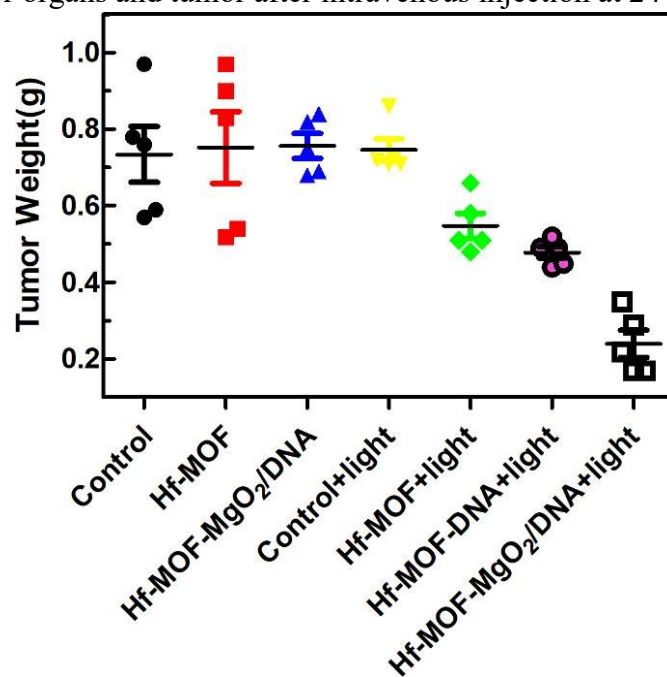

**Fig. S19.** Tumor weight of different groups after treatment.
